# Supplementary material for: Microbiota supplementation with Bifidobacterium and Lactobacillus modifies the preterm infant gut microbiota and metabolome
Source: bioRxiv or medRxiv preprint supplement (doi:10.1101/698092), 2019-10-04
Supplement: Supplementary file [file media-1.pdf]

**Supplementary Table 1: Summary statistics for preterm infants recruited in the study**

|                                                  | Group            |                  | p-value |
|--------------------------------------------------|------------------|------------------|---------|
|                                                  | Control          | Bif/Lacto        |         |
| <b>n</b>                                         | <b>133</b>       | <b>101</b>       |         |
| <b>Sex (n (%))</b>                               |                  |                  |         |
| <i>Female</i>                                    | 75 (56.4)        | 45 (44.6)        | 0.096   |
| <i>Male</i>                                      | 58 (43.6)        | 56 (55.4)        |         |
| <b>Delivery (n (%))</b>                          |                  |                  |         |
| <i>Vaginal</i>                                   | 61 (45.9)        | 46 (45.5)        | 1       |
| <i>Cesarean</i>                                  | 72 (54.1)        | 55 (54.5)        |         |
| <b>Birthweight in grams (mean (SD))</b>          |                  |                  |         |
|                                                  | 1146.02 (337.19) | 1127.17 (311.97) | 0.662   |
| <b>Gestational age in weeks (mean (SD))</b>      |                  |                  |         |
|                                                  | 28.35 (2.29)     | 28.55 (2.77)     | 0.545   |
| <b>Length of NICU stay (days) (mean (SD))</b>    |                  |                  |         |
|                                                  | 45.86 (22.79)    | 53.06 (32.71)    | 0.055   |
| <b>Length of antibiotics (n (%))</b>             |                  |                  |         |
| <i>Long</i>                                      | 25 (18.8)        | 42 (41.6)        | 0.001   |
| <i>Short</i>                                     | 94 (70.7)        | 54 (53.5)        |         |
| <i>None</i>                                      | 13 (9.8)         | 5 (5.0)          |         |
| <i>NA</i>                                        | 1 (0.8)          | 0 (0.0)          |         |
| <b>Hospital (n (%))</b>                          |                  |                  |         |
| <i>Norfolk and Norwich</i>                       | -                | 101 (100.0)      |         |
| <i>St Mary's</i>                                 | 65 (48.9)        | -                |         |
| <i>Queen Charlotte's</i>                         | 54 (40.6)        | -                |         |
| <i>Addenbrookes</i>                              | 14 (10.5)        | -                |         |
| <b>Total diet composition (n (%))</b>            |                  |                  |         |
| <i>Breast milk</i>                               | 36 (27.1)        | 70 (69.3)        | <0.001  |
| <i>Breast milk + Donor breast milk</i>           | 68 (51.1)        | 7 (6.9)          |         |
| <i>Breast milk + Formula</i>                     | 13 (9.8)         | 14 (13.9)        |         |
| <i>Breast milk + Donor breast milk + Formula</i> | 13 (9.8)         | 5 (5.0)          |         |
| <i>Donor milk</i>                                | 0 (0.0)          | 1 (1.0)          |         |
| <i>Formula</i>                                   | 3 (2.3)          | 4 (4.0)          |         |

n = number of infants.

SD = standard deviation.

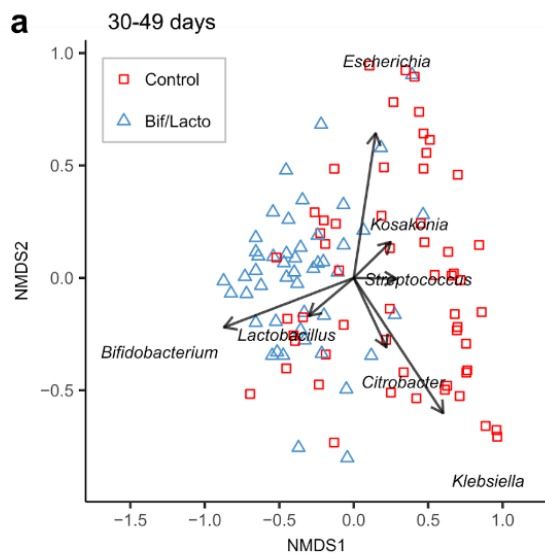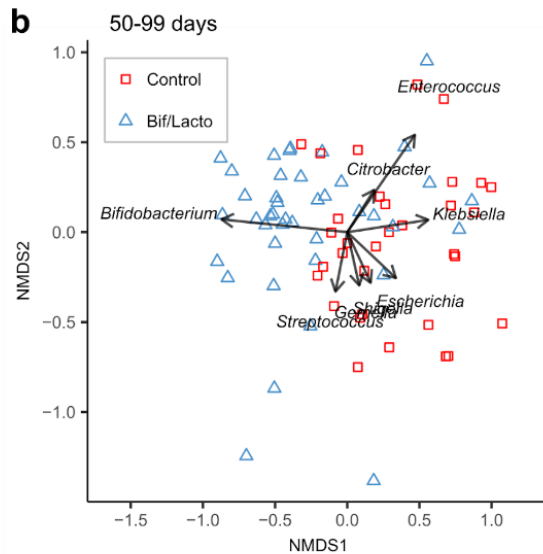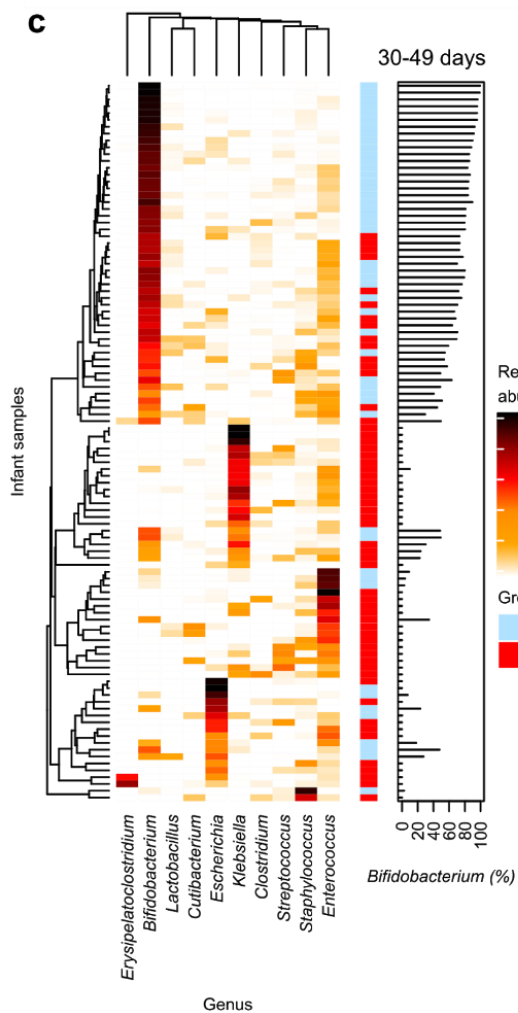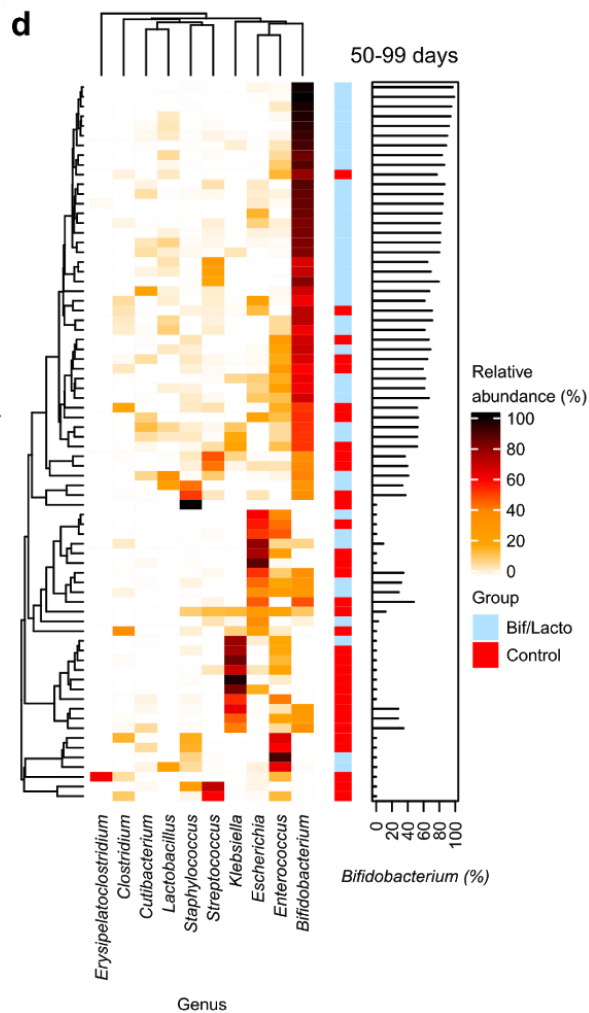

**Supplementary Figure 1: Clustering of samples and genus composition.**

**a**, Infant fecal microbiota similarity at 30-49 days and **b**, at 50-99 days shown using NMDS (non-metric multidimensional scaling) analysis clustered with a Bray-Curtis dissimilarity. Arrows indicate bacterial genera driving the separation of points on the NMDS plots. **c**, Heatmaps showing the ten genera with highest proportional abundance at 30-49 days and **d**, at 50-99 days of age.

Heatmap rows were clustered using Bray-Curtis dissimilarity. Side bar plots show the proportional abundance of *Bifidobacterium* in each sample.

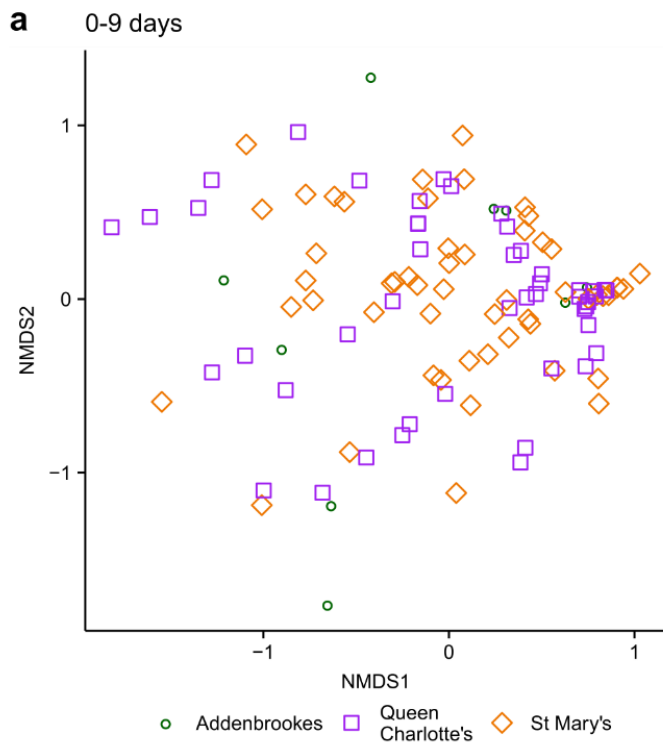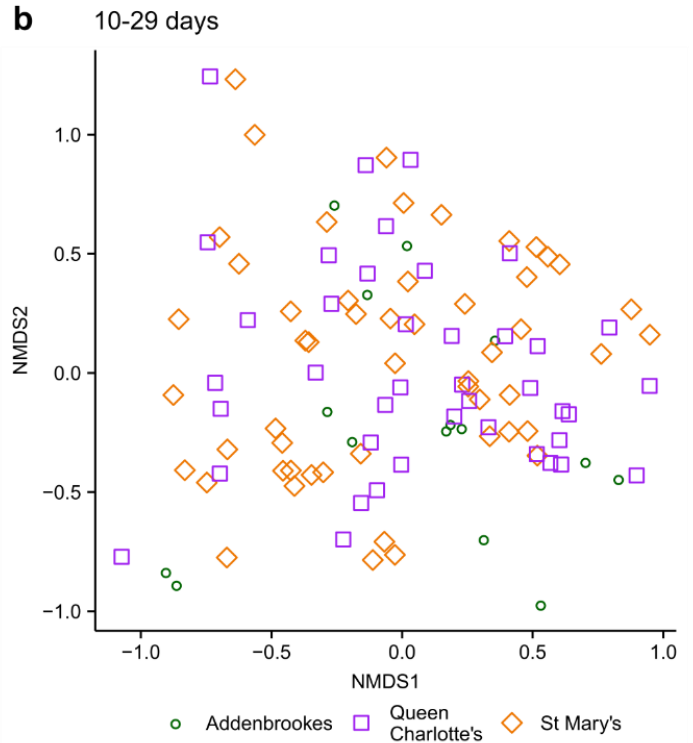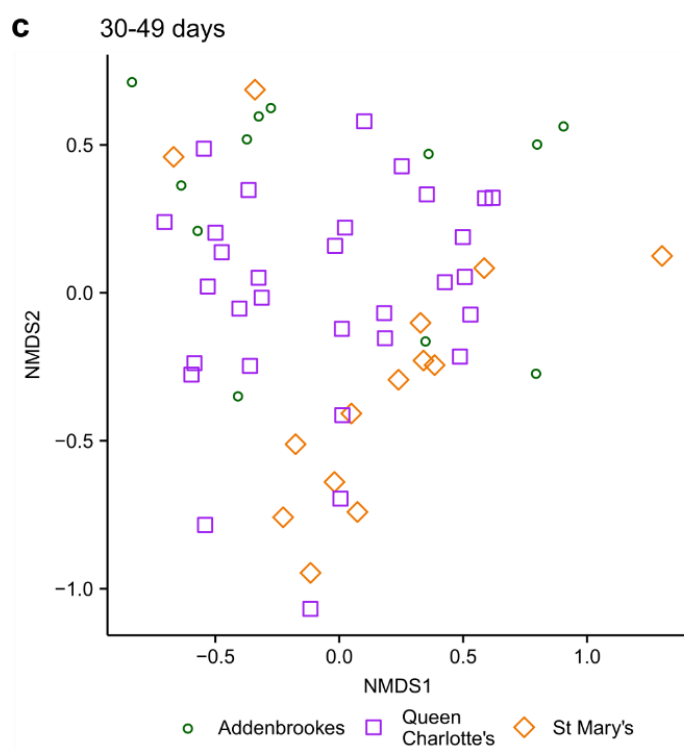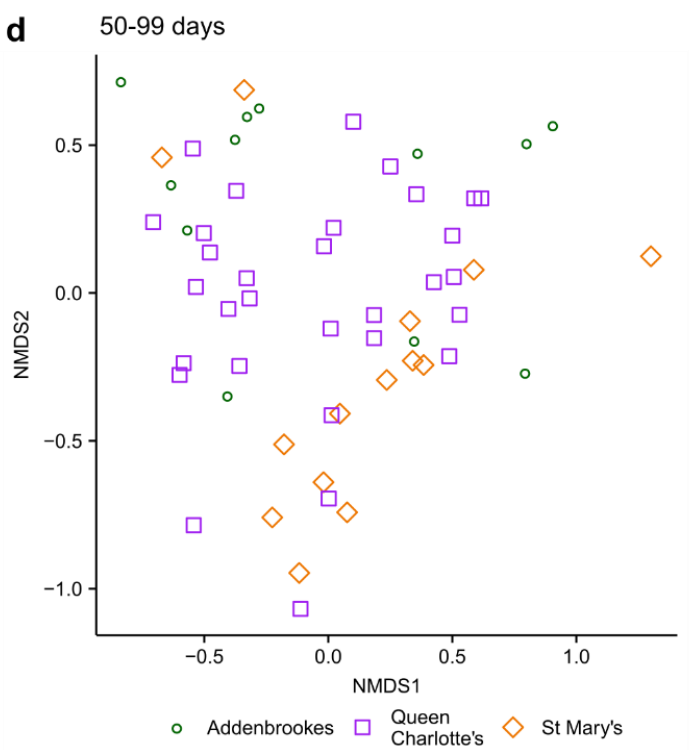

**Supplementary Figure 2: Non-metric multidimensional scaling (NMDS) comparing microbiota composition between Control hospital NICUs.**

**a**, Infant fecal microbiota composition compared by NICU at 0-9 days (Stress: 0.16; PERMANOVA:  $P = 0.42$ ). **b**, Infant fecal microbiota composition compared by NICU at 10-29 days (Stress: 0.19; PERMANOVA:  $P = 0.33$ ). **c**, Infant fecal microbiota composition compared by NICU at 30-49 days (Stress: 0.17; PERMANOVA:  $P = 0.13$ ). **d**, Infant fecal microbiota composition compared by NICU at 50-99 days (Stress: 0.17; PERMANOVA:  $P = 0.029$ , Post-hoc analysis  $P > 0.05$ ). NMDS analysis clustered using Bray-Curtis dissimilarity.

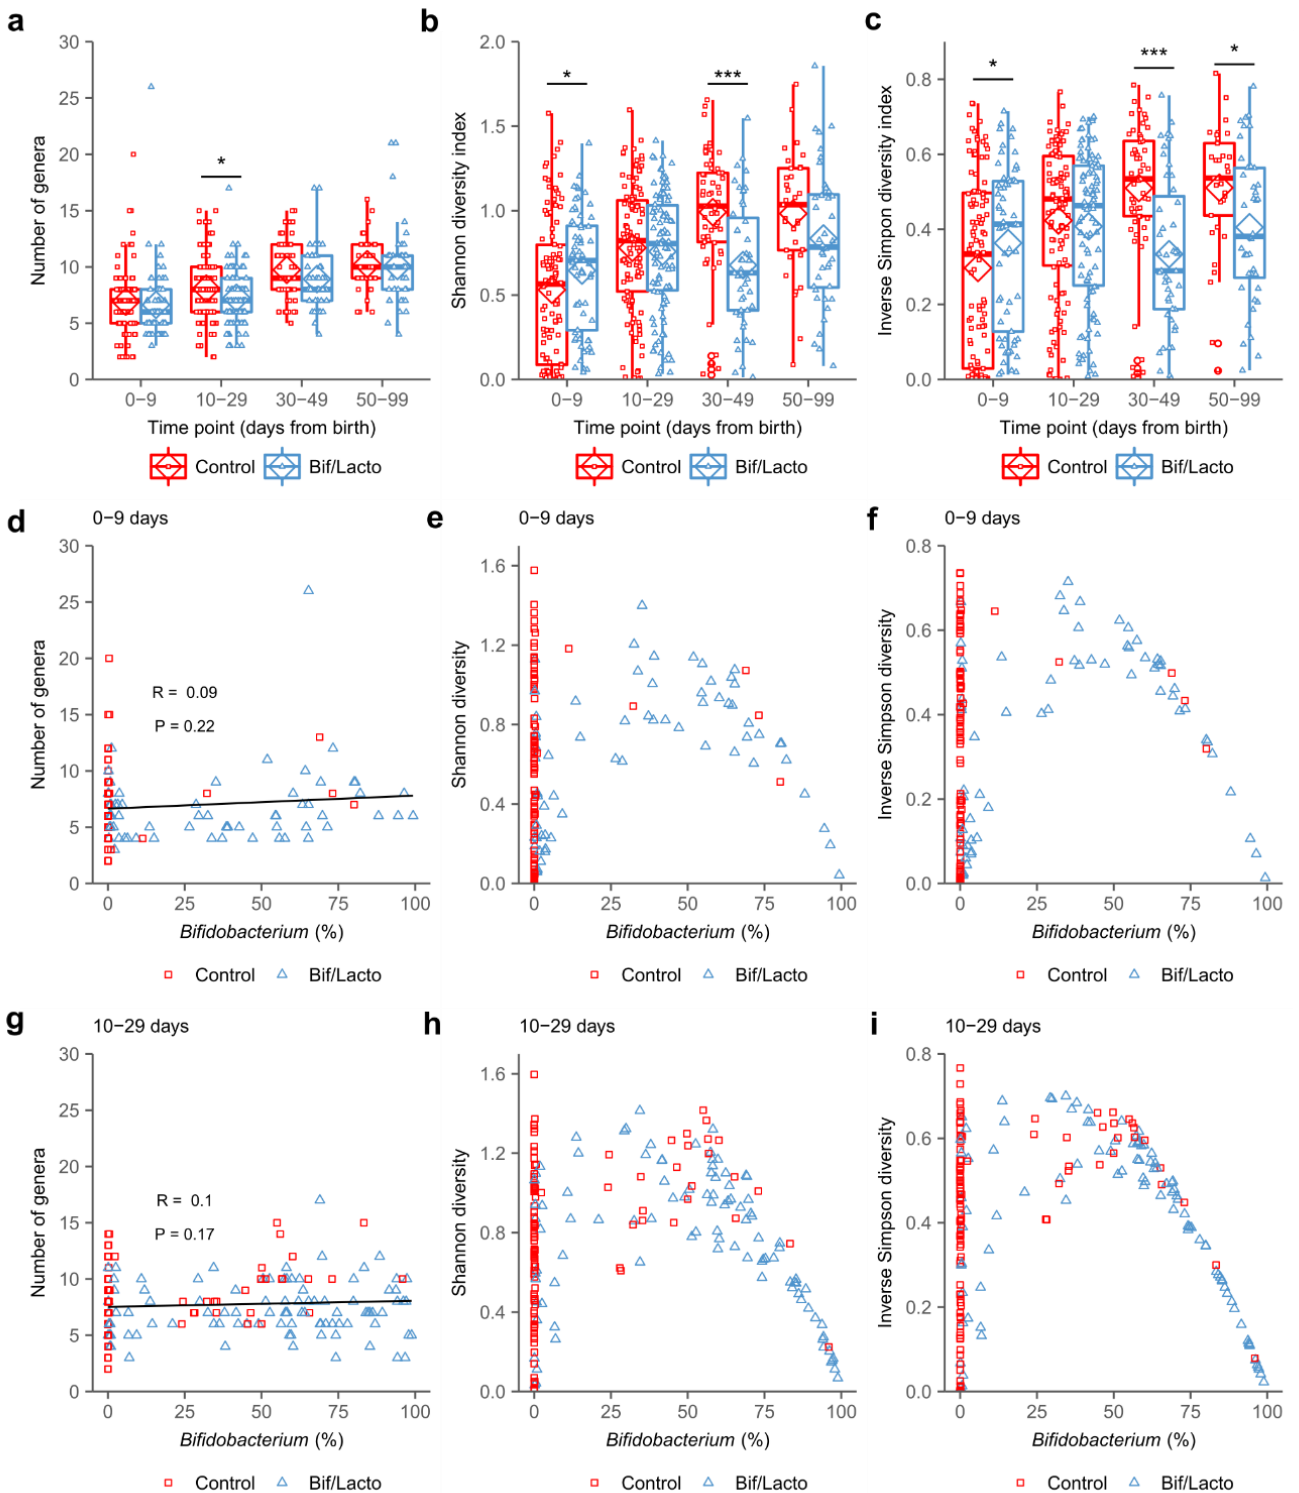

**Supplementary Figure 3: Microbiota diversity.**

**a**, Number of genera detected in each infant sample. **b**, Shannon diversity index of each infant sample. **c**, Inverse Simpson diversity index of each infant sample. **d**, Number of genera against *Bifidobacterium* abundance at 0-9 days. **e**, Shannon diversity against *Bifidobacterium* abundance at 0-9 days. **f**, Inverse Simpson diversity against *Bifidobacterium* abundance at 0-9 days. **g**, Number of genera against *Bifidobacterium* abundance at 10-29 days. **h**, Shannon diversity against *Bifidobacterium* abundance at 10-29 days. **i**, Inverse Simpson diversity *Bifidobacterium* abundance at 10-29 days. Individual points show each infant sample, the diamond indicates the group mean, box plots show median and interquartile ranges.

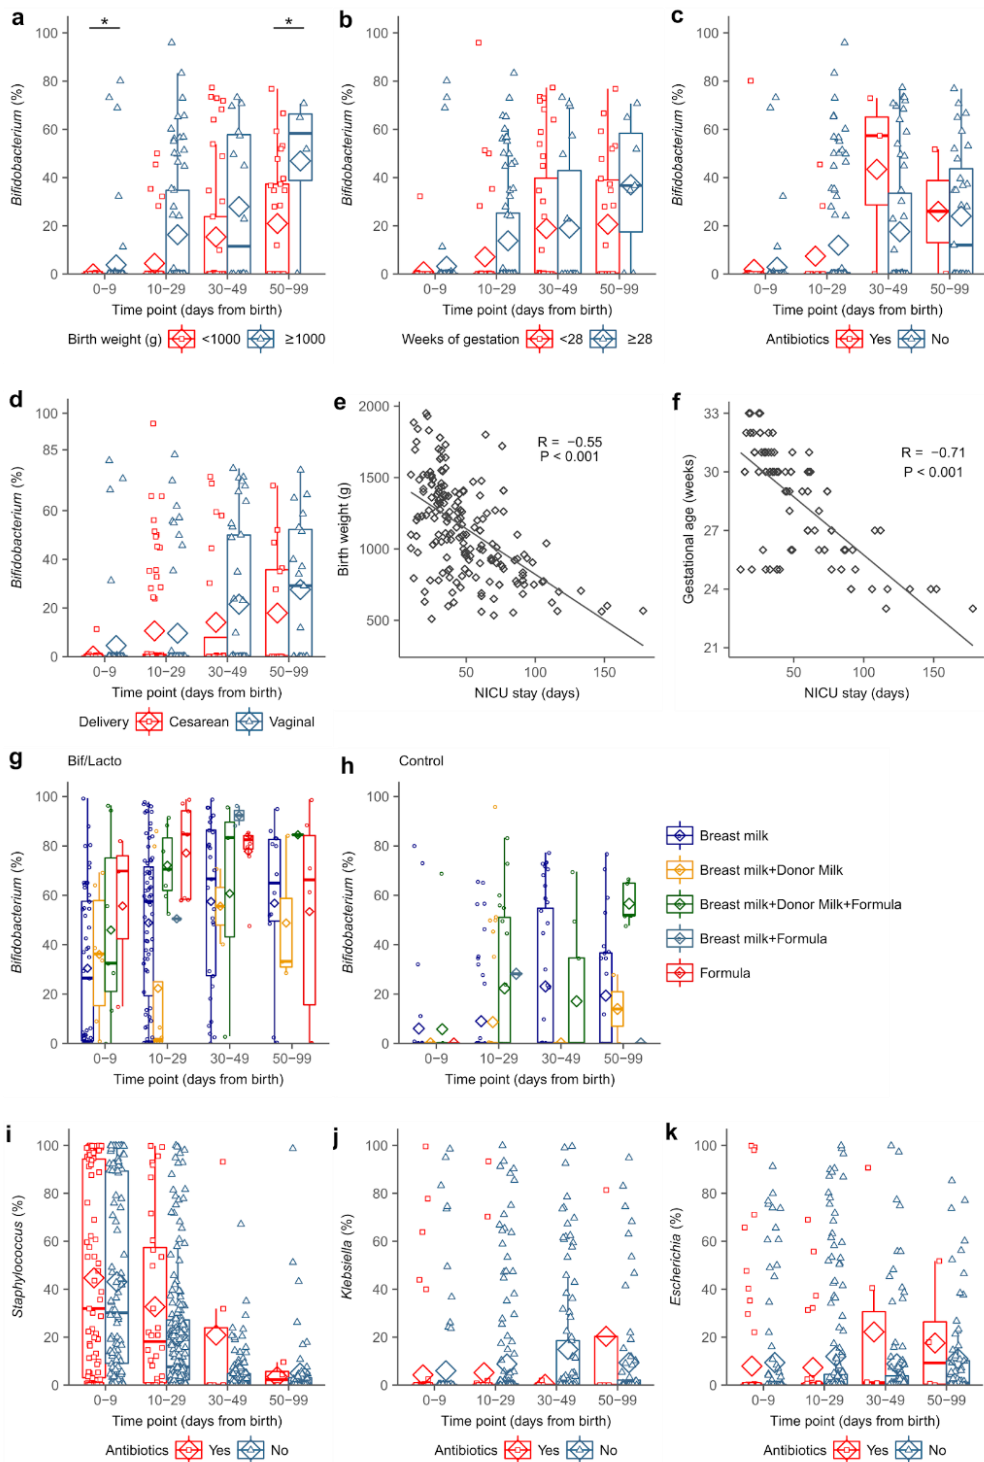

**Supplementary Figure 4: Effects of birthweight, antibiotics, delivery mode and diet on *Bifidobacterium*.**

**a**, Control group *Bifidobacterium* abundance between very low birth weight (<1000 g) and low birth weight ( $\geq 1000$  g) infants. **b**, Control group *Bifidobacterium* abundance infants with very low gestational age (<28 weeks) and low gestational age ( $\geq 28$  weeks). **c**, Control group *Bifidobacterium* abundance in infants receiving antibiotics at the time of sample collection. **d**, Control group *Bifidobacterium* abundance in infants delivered by caesarean and vaginal birth. **e**, Birth weight correlated with length of stay in NICU in all infants. **f**, Gestational age correlated with length of stay in NICU in all infants. **g**, Bif/Lacto group *Bifidobacterium* abundance by diet group. **h**, Control group *Bifidobacterium* abundance by diet group. **i**, *Staphylococcus* abundance in infants receiving antibiotics at the time of sample collection. **j**, *Klebsiella* abundance in infants receiving antibiotics at the time of sample collection. **k**, *Escherichia* abundance in infants receiving antibiotics at the time of sample collection. Asterisks represent  $p$  values: \* $P < 0.05$ .

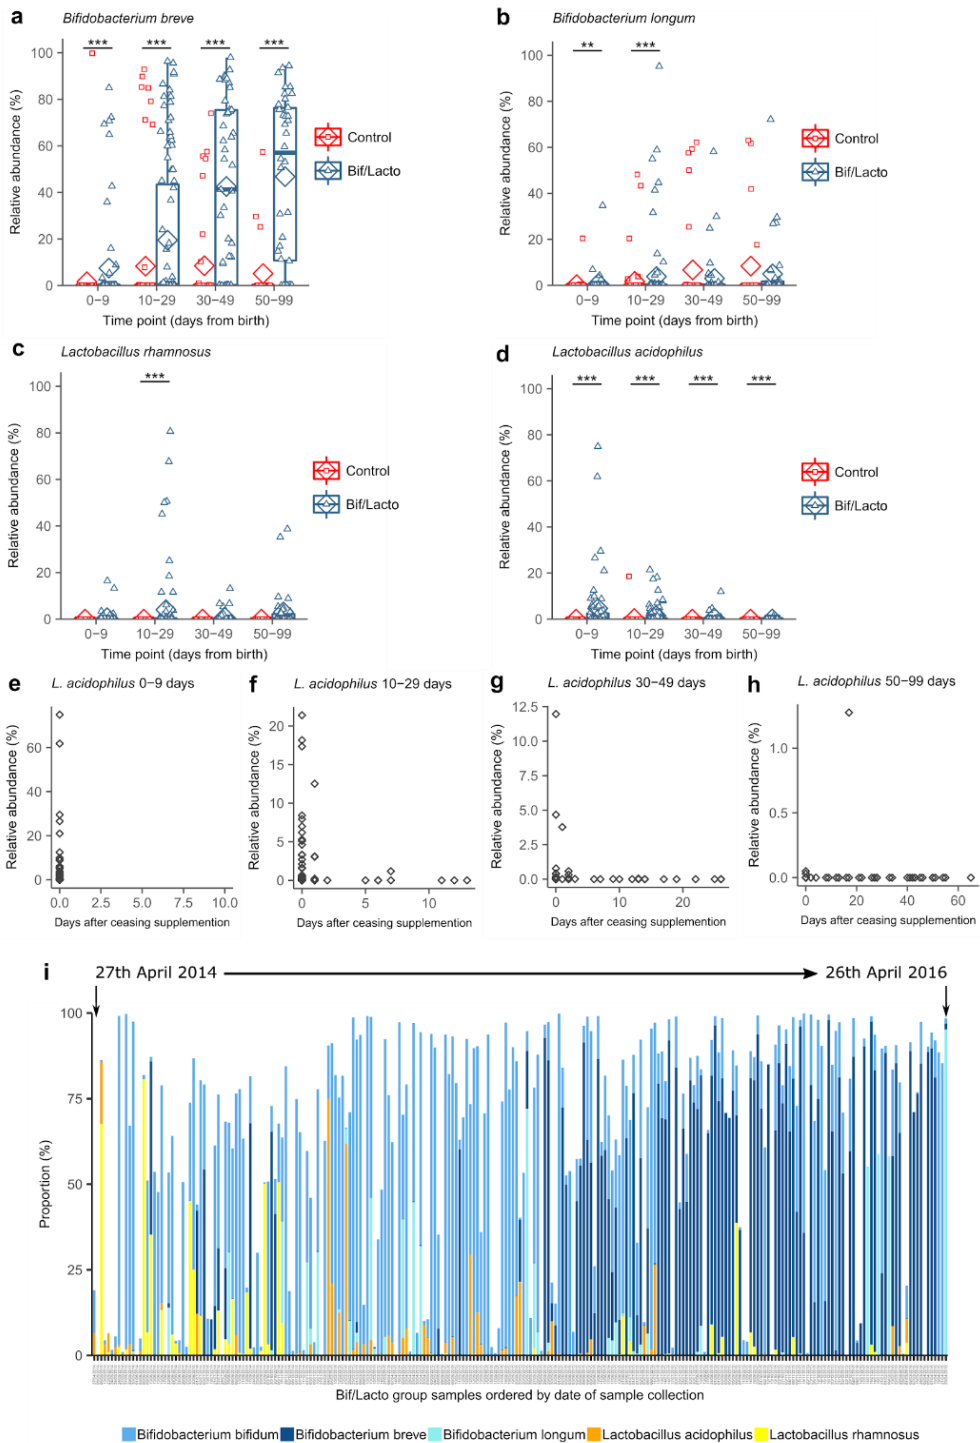

**Supplementary Figure 5: *Bifidobacterium* species level abundance and over time.**

**a**, *Bifidobacterium breve* proportional abundance. **b**, *Bifidobacterium longum* proportional abundance. **c**, *Lactobacillus rhamnosus* proportional abundance. **d**, *Lactobacillus acidophilus* proportional abundance. **e-h**, Correlation between *Lactobacillus acidophilus* abundance and days after ceasing receiving supplementation. **i**, *Bifidobacterium* and *Lactobacillus* species abundance in Bif/Lacto infant samples arranged in chronological order by date of sample collection. Asterisks represent  $p$  values: \* $P < 0.05$ , \*\* $P < 0.01$ , \*\*\* $P < 0.001$ .

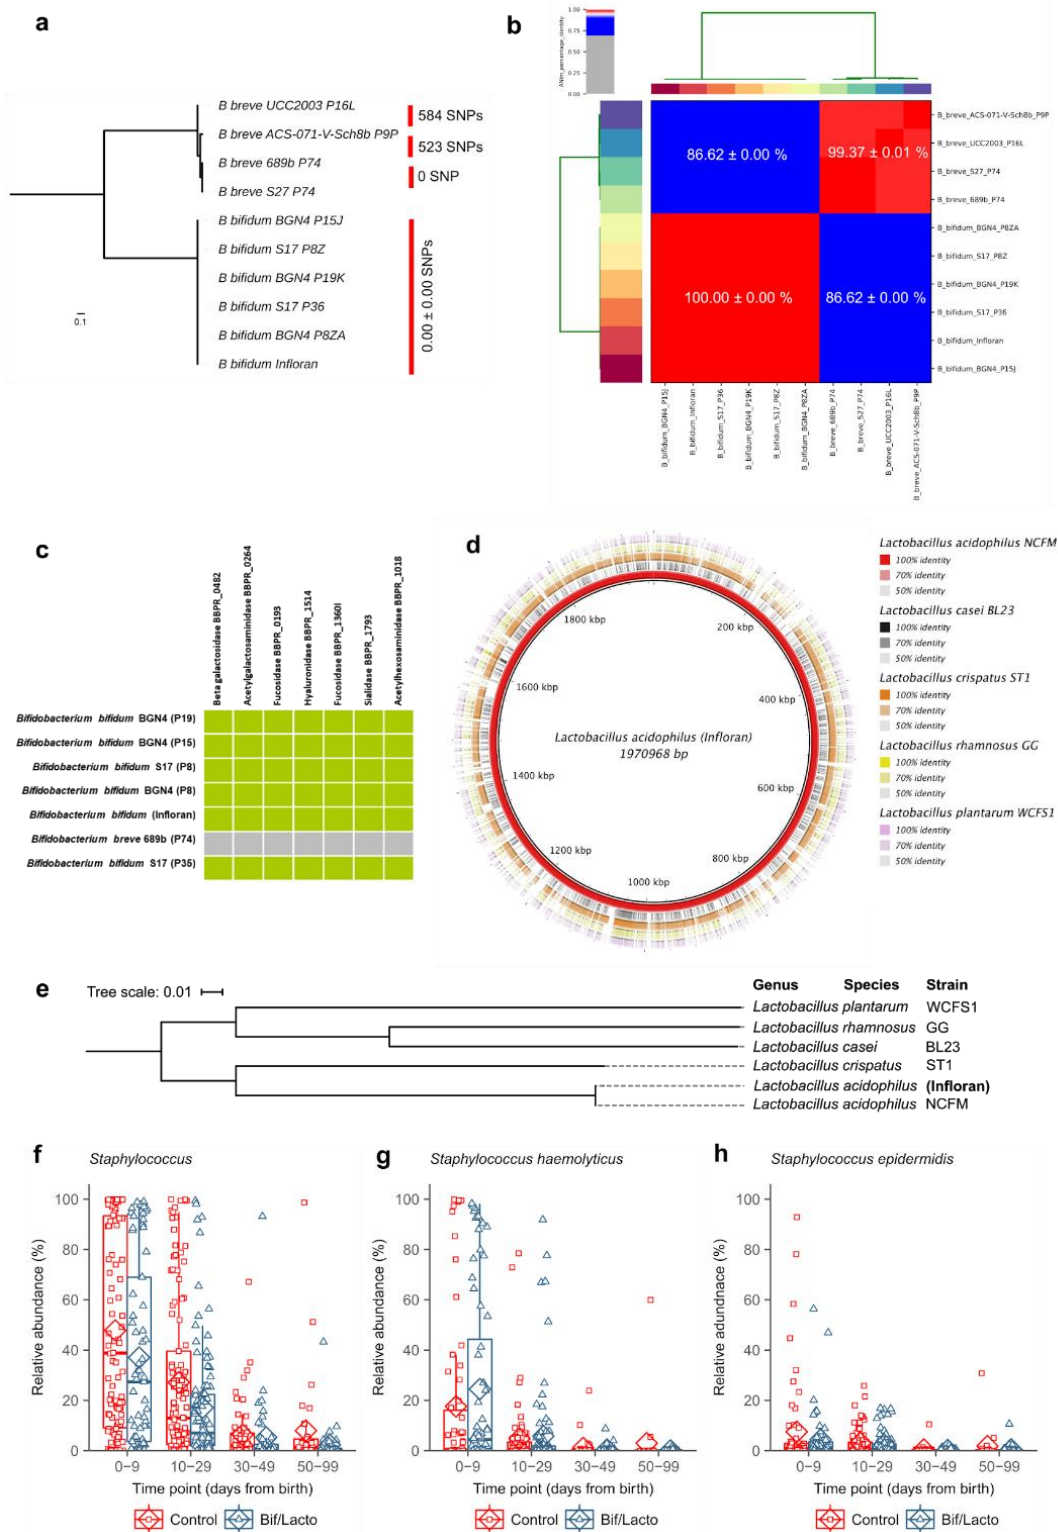

**Supplementary Figure 6: Lactobacillus genome comparison and Staphylococcus species.**

**a**, Mid-point rooted maximum-likelihood tree based on 6,202 SNPs in 87 core genes from 10 *Bifidobacterium* genomes. Data: mean ± S.D. **b**, Average Nucleotide Identity pairwise comparison between 10 *Bifidobacterium* strains. Data: mean ± S.D. **c**, Heat map representing *B. bifidum* genes involved in mucin degradation. **d**, Circular genome diagrams from *Lactobacillus acidophilus* present in the oral supplementation and a subset of five *Lactobacillus* species from NCBI database. Similarity was calculated using BLAST. **e**, Core genome tree comparison from *Lactobacillus* present in the oral supplementation and five other *Lactobacillus* species from NCBI database which were found most abundant in the 16S rRNA gene data. Roary core gene alignment output was used to create a maximum likelihood (ML) phylogenetic tree **f**, *Staphylococcus* genus relative abundance. **g**, *Staphylococcus haemolyticus* relative abundance. **h**, *Staphylococcus epidermidis* relative abundance.

**a**

| Timepoint | n   | Q2Y      | p    |
|-----------|-----|----------|------|
| 1         | 38  | 0.562(1) | 0.01 |
| 2         | 44  | 0.652(0) | 0.01 |
| 3         | 44  | 0.520(1) | 0.01 |
| 4         | 24  | 0.465(0) | 0.01 |
| Combined  | 157 | 0.587(1) | 0.01 |

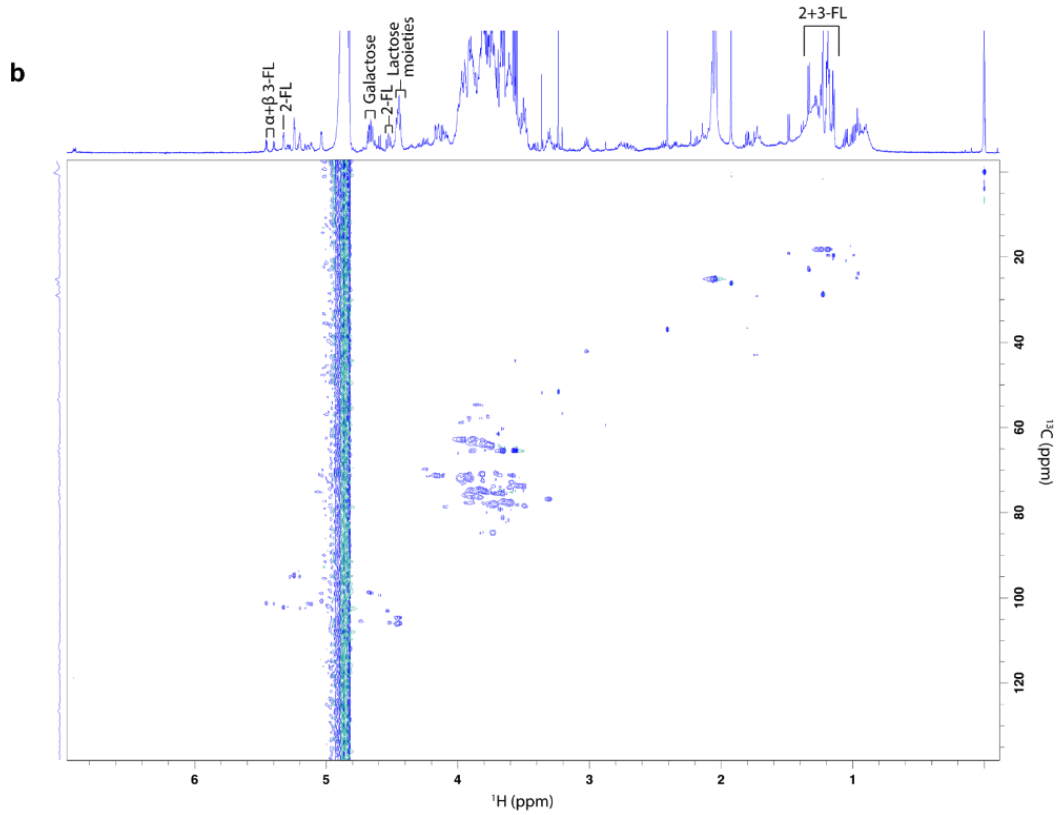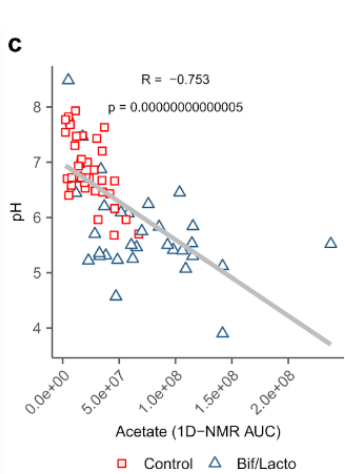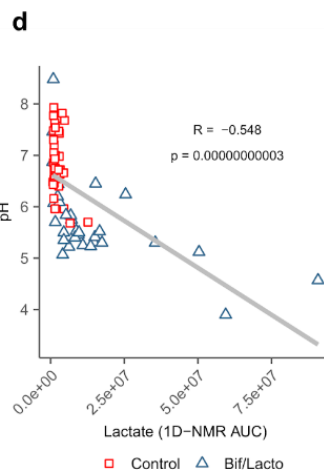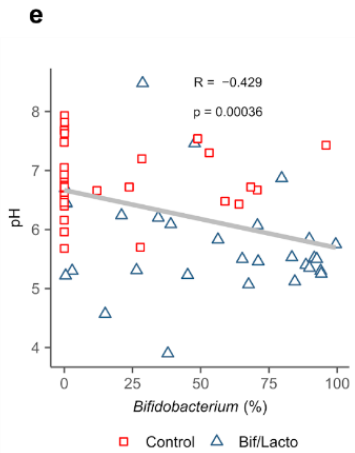

**Supplementary Figure 7: OPLS-DA model comparing the fecal  $^1\text{H}$  NMR spectra of the Bif/Lacto Group and Control Group, and 2D-NMR analysis**  
**a**, Predictive performance (Q2Y) and  $p$  values of the Orthogonal Projections to Latent Structures Discriminant Analysis (OPLS-DA) models comparing the Bif/Lacto and Control fecal profiles at individual time points and all timepoints combined. **b**, HSQC 2D-NMR spectrum from a study fecal sample. **c**, Spearman correlation between fecal acetate and fecal pH. **d**, Correlation between fecal lactate and fecal pH. **e**, Correlation between percentage of *Bifidobacterium* and fecal pH.



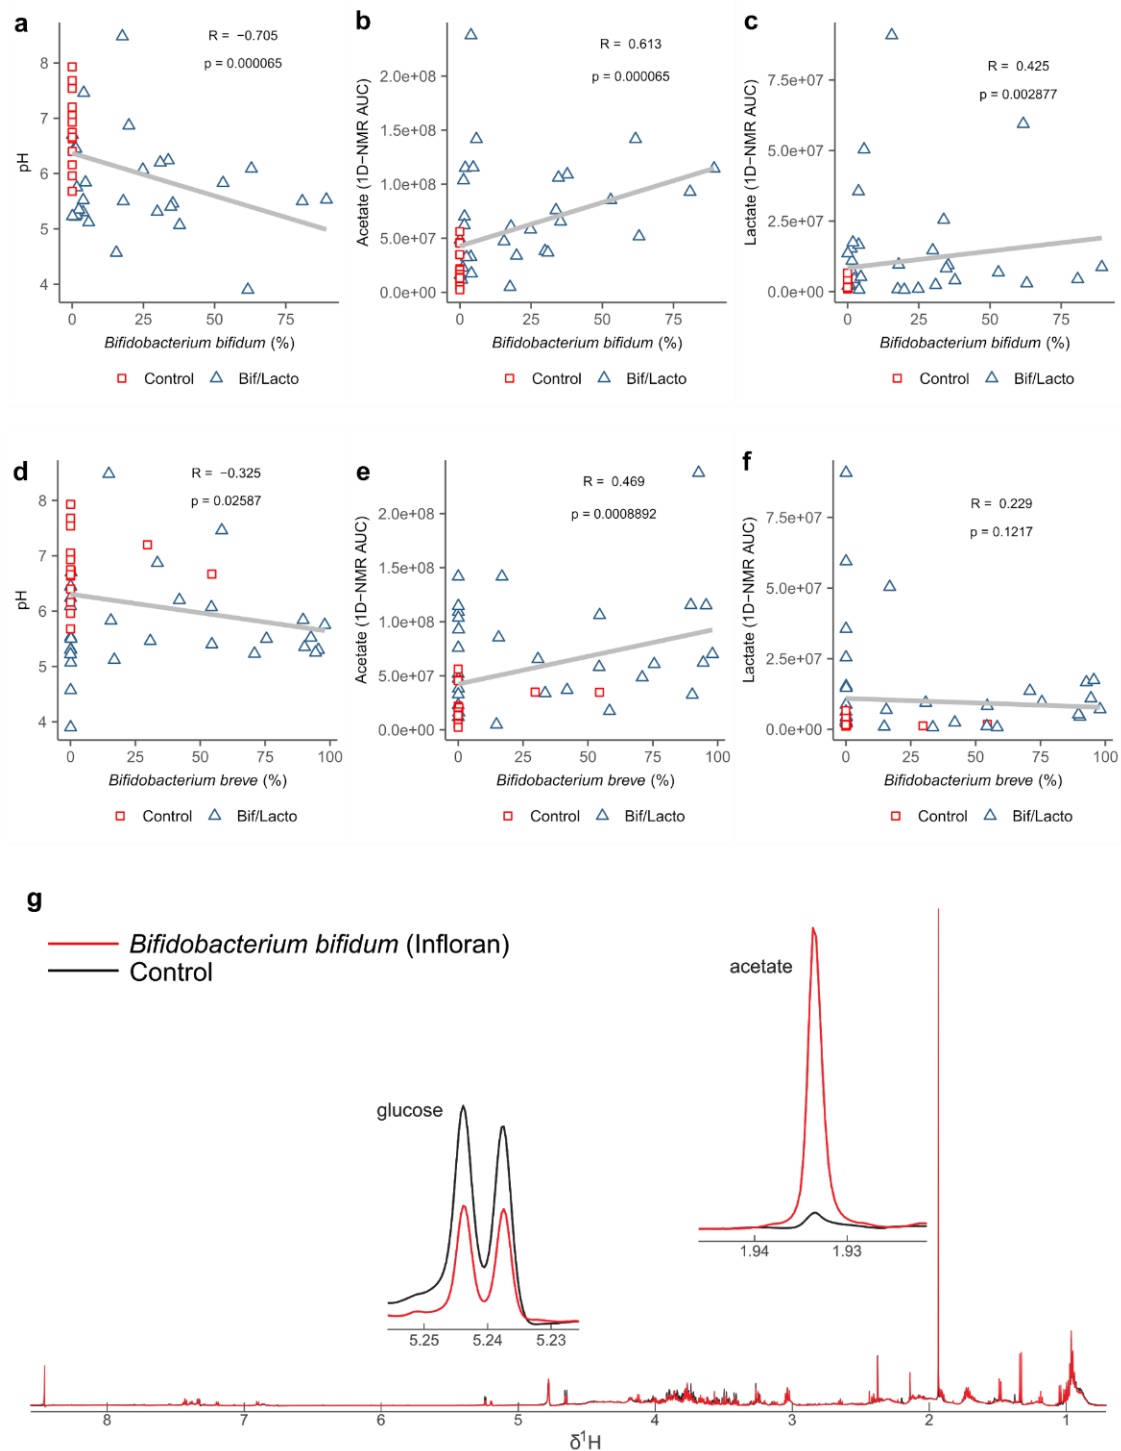

**Supplementary Figure 8:  $^1\text{H}$ -NMR AUC acetate levels found in Bif/Lacto Group and Control Group.**

**a**, Correlation between relative abundance of *Bifidobacterium bifidum* and fecal pH. **b**, Correlation between relative abundance of *B. bifidum* and fecal acetate. **c**, Correlation between relative abundance of *B. bifidum* and fecal lactate. **d**, Correlation between relative abundance of *Bifidobacterium breve* and fecal pH. **e**, Correlation between relative abundance of *B. breve* and fecal acetate. **f**, Correlation between relative abundance of *B. breve* and fecal lactate. **g**,  $^1\text{H}$  NMR spectra of the culture media from *Bifidobacterium bifidum* Infloran (red) and negative control (black).
