# Supplementary material for: Microbiota supplementation with Bifidobacterium and Lactobacillus modifies the preterm infant gut microbiota and metabolome
Source: bioRxiv or medRxiv preprint supplement (doi:10.1101/698092), 2019-10-04
Supplement: Supplementary file [file media-2.pdf]

**Supplementary Table 2** - AMR gene analysis and phenotypic characterisation of *Bifidobacterium bifidum* (Infloran)

**a** *Bifidobacterium bifidum* (Infloran)

| Gene | Identity (%) | Resistance to |
|------|--------------|---------------|
| ileS | 99.13        | Mupirocin     |

**b**

*Bifidobacterium bifidum*

| Antibiotic       | MIC (mg/L) | Eucast value (mg/L) |
|------------------|------------|---------------------|
| Benzylpenicillin | 0.11       | 0.12 (ampicillin)   |
| Gentamicin       | 39         | 64                  |
| Meropenem        | 0.095      | ND                  |
