# Supplementary material for: Microbiota supplementation with Bifidobacterium and Lactobacillus modifies the preterm infant gut microbiota and metabolome
Source: bioRxiv or medRxiv preprint supplement (doi:10.1101/698092), 2019-10-04
Supplement: Supplementary file [file media-4.pdf]

Supplementary Table 4: Primer sequences for amplifying V1+V2 region of 16S rRNA gene using MiSeq Illumina.

| 9 forward (FW) primers<br>12 reverse (RV) primers | Total Primer sequences                                                |
|---------------------------------------------------|-----------------------------------------------------------------------|
| <b>V1FW_SD501</b>                                 | AATGATACGGCGACCACCGAGATCTACACAAGCAGCATATGGTAATTGTAGMGTTYGATYMTGGCTCAG |
| <b>V1FW_SD502</b>                                 | AATGATACGGCGACCACCGAGATCTACACACGCGTGATATGGTAATTGTAGMGTTYGATYMTGGCTCAG |
| <b>V1FW_SD503</b>                                 | AATGATACGGCGACCACCGAGATCTACACCGATCTACTATGGTAATTGTAGMGTTYGATYMTGGCTCAG |
| <b>V1FW_SD504</b>                                 | AATGATACGGCGACCACCGAGATCTACACTGCGTCACTATGGTAATTGTAGMGTTYGATYMTGGCTCAG |
| <b>V1FW_SD505</b>                                 | AATGATACGGCGACCACCGAGATCTACACGTCTAGTGATGGTAATTGTAGMGTTYGATYMTGGCTCAG  |
| <b>V1FW_SD506</b>                                 | AATGATACGGCGACCACCGAGATCTACACCTAGTATGTATGGTAATTGTAGMGTTYGATYMTGGCTCAG |
| <b>V1FW_SD507</b>                                 | AATGATACGGCGACCACCGAGATCTACACGATAGCGTTATGGTAATTGTAGMGTTYGATYMTGGCTCAG |
| <b>V1FW_SD508</b>                                 | AATGATACGGCGACCACCGAGATCTACACTCTACCTTATGGTAATTGTAGMGTTYGATYMTGGCTCAG  |
| <b>V1FW_SA501</b>                                 | AATGATACGGCGACCACCGAGATCTACACATCGTACGTATGGTAATTGTAGMGTTYGATYMTGGCTCAG |
| <b>V2RV_SD701</b>                                 | CAAGCAGAAGACGGCATAACGAGATACCTAGTAAGTCAGTCAGCCGCTGCCTCCCGTAGGAGT       |
| <b>V2RV_SD702</b>                                 | CAAGCAGAAGACGGCATAACGAGATACGTACGTAGTCAGTCAGCCGCTGCCTCCCGTAGGAGT       |
| <b>V2RV_SD703</b>                                 | CAAGCAGAAGACGGCATAACGAGATATATCGCGAGTCAGTCAGCCGCTGCCTCCCGTAGGAGT       |
| <b>V2RV_SD704</b>                                 | CAAGCAGAAGACGGCATAACGAGATCAGATAGAGTCAGTCAGCCGCTGCCTCCCGTAGGAGT        |
| <b>V2RV_SD705</b>                                 | CAAGCAGAAGACGGCATAACGAGATCGTATCGCAGTCAGTCAGCCGCTGCCTCCCGTAGGAGT       |
| <b>V2RV_SD706</b>                                 | CAAGCAGAAGACGGCATAACGAGATCTGCGACTAGTCAGTCAGCCGCTGCCTCCCGTAGGAGT       |
| <b>V2RV_SD707</b>                                 | CAAGCAGAAGACGGCATAACGAGATGCTGTAACAGTCAGTCAGCCGCTGCCTCCCGTAGGAGT       |
| <b>V2RV_SD708</b>                                 | CAAGCAGAAGACGGCATAACGAGATGGACGTTAAGTCAGTCAGCCGCTGCCTCCCGTAGGAGT       |
| <b>V2RV_SD709</b>                                 | CAAGCAGAAGACGGCATAACGAGATGGTCGTAGAGTCAGTCAGCCGCTGCCTCCCGTAGGAGT       |
| <b>V2RV_SD710</b>                                 | CAAGCAGAAGACGGCATAACGAGATTAAGTCTCAGTCAGTCAGCCGCTGCCTCCCGTAGGAGT       |
| <b>V2RV_SD711</b>                                 | CAAGCAGAAGACGGCATAACGAGATTACACAGTACAGTCAGCCGCTGCCTCCCGTAGGAGT         |
| <b>V2RV_SD712</b>                                 | CAAGCAGAAGACGGCATAACGAGATTTGACGCAAGTCAGTCAGCCGCTGCCTCCCGTAGGAGT       |
