# Supplementary material for: Microbiota supplementation with Bifidobacterium and Lactobacillus modifies the preterm infant gut microbiota and metabolome
Source: bioRxiv or medRxiv preprint supplement (doi:10.1101/698092), 2019-10-04
Supplement: Supplementary file [file media-5.pdf]

Supplementary table 5 - *B.bifidum* HMOs and mucin degradation genes

| Gene                | Function                | Publication                                                                                                                                                                                                          |
|---------------------|-------------------------|----------------------------------------------------------------------------------------------------------------------------------------------------------------------------------------------------------------------|
| <i>InbB</i>         | HMO degradation         | Biosidase, a Critical Enzyme for the Degradation of Human Milk Oligosaccharides with a Type 1 Structure. <i>Applied and Environmental Microbiology</i> <b>74</b> , 3996-4004 (2008).                                 |
| <i>afcB, AfcA</i>   |                         | Two distinct $\alpha$ -l-fucosidases from Bifidobacterium bifidum are essential for the utilization of fucosylated milk oligosaccharides and glycoconjugates. <i>Glycobiology</i> <b>19</b> , 1010-1017 (2009)       |
| <i>BbhI, BbgIII</i> |                         | Cooperation of $\beta$ -galactosidase and $\beta$ -N-acetylhexosaminidase from bifidobacteria in assimilation of human milk oligosaccharides with type 2 structure. <i>Glycobiology</i> <b>20</b> , 1402-1409 (2010) |
| <i>Siabb2</i>       |                         | Extracellular Sialidase Enhances Adhesion to the Mucosal Surface and Supports Carbohydrate Assimilation. <i>mBio</i> <b>8</b> , e00928-00917 (2017).                                                                 |
| BBPR_0193,          | Mucin degradation genes | Genome analysis of Bifidobacterium bifidum PRL2010 reveals metabolic pathways for host-derived glycan foraging. <i>Proc Natl Acad Sci U S A</i> <b>107</b> , 19514-19519 (2010)                                      |
| BBPR_1360           |                         |                                                                                                                                                                                                                      |
| BBPR_1793           |                         |                                                                                                                                                                                                                      |
| BBPR_0482           |                         |                                                                                                                                                                                                                      |
| BBPR_0264           |                         |                                                                                                                                                                                                                      |
| BBPR_1514           |                         |                                                                                                                                                                                                                      |
| BBPR_1018           |                         |                                                                                                                                                                                                                      |
